# Supplementary material for: Computational prediction of a novel 1D InSeI nanochain with high stability and promising wide-bandgap properties
Source: Royal Society of Chemistry journal article supplement (doi:10.1039/d0cp04922k), 2020-01-01
Supplement: d0cp04922k1.pdf [file d0cp04922k1.pdf]

Electronic supplementary information:

## **Computational prediction of a novel 1D InSeI nanochain with high stability and promising wide-bandgap properties**

Shujuan Jiang,<sup>a</sup> Huabing Yin,<sup>\*a</sup> Guang-Ping Zheng,<sup>\*b</sup> Bing Wang,<sup>a</sup> Shan Guan,<sup>c</sup> and  
Bing-Jian Yao<sup>d</sup>

*<sup>a</sup>Institute for Computational Materials Science, School of Physics and Electronics, International Joint  
Research Laboratory of New Energy Materials and Devices of Henan Province, Henan University,  
Kaifeng 475004, China.*

*<sup>b</sup>Department of Mechanical Engineering, The Hong Kong Polytechnic University,  
Hung Hom, Kowloon, Hong Kong 999077, China.*

*<sup>c</sup>State Key Laboratory of Superlattices and Microstructures, Institute of Semiconductors, Chinese  
Academy of Sciences, Beijing 100083, China.*

*<sup>d</sup>College of Chemistry, Chemical Engineering and Materials Science, Collaborative Innovation Center  
of Functionalized Probes for Chemical Imaging in Universities of Shandong, Key Laboratory of  
Molecular and Nano Probes, Ministry of Education, Shandong Normal University, Jinan 250014,  
China.*

\*E-mails: yhb@henu.edu.cn and mmzheng@polyu.edu.hk

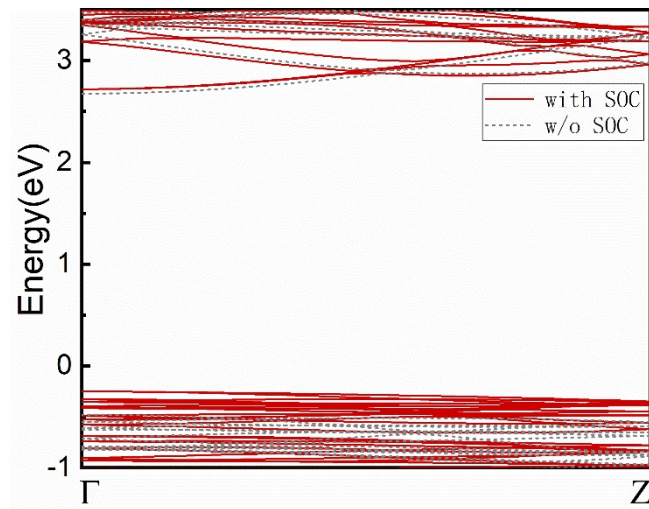

**Figure S1.** Band structures of InSeI single nanochain calculated by HSE06 with SOC (in red) and without SOC (in grey), respectively.

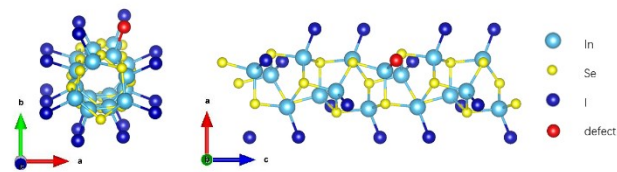

**Figure S2.** Structural configuration of 1D single nanochain of InSeI with a surface defect of I vacancy (in red).

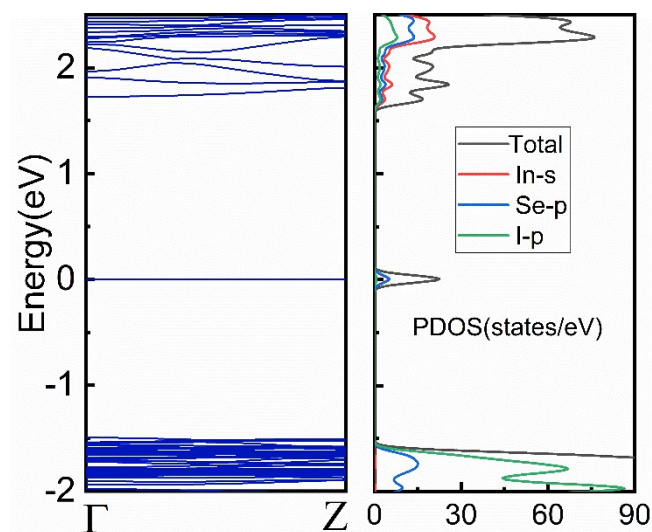

**Figure S3.** Band structure and the partial density of states (PDOS) calculated by HSE06 of InSeI single nanochain with a surface defect of I vacancy.
